# Supplementary material
Source: publisher figshare collection journal article supplement (https://sage.figshare.com/ndownloader/files/18027905)
Supplement: Supplementary file 1 [file 18027905]

## Pain Intensity – 1a

Please respond to the question by marking one box.

### Pain Intensity

**In the past 7 days...**

Global07

How would you rate your pain on average?.....

☐

0

No  
pain

☐

1

☐

2

☐

3

☐

4

☐

5

☐

6

☐

7

☐

8

☐

9

☐

10

Worst  
imaginable  
pain

## Global Health

Please respond to each question or statement by marking one box per row.

|           |                                                                                                                                                                                                                                        | Excellent                     | Very good                     | Good                          | Fair                          | Poor                          |
|-----------|----------------------------------------------------------------------------------------------------------------------------------------------------------------------------------------------------------------------------------------|-------------------------------|-------------------------------|-------------------------------|-------------------------------|-------------------------------|
| Global01  | In general, would you say your health is: .....                                                                                                                                                                                        | <input type="checkbox"/><br>5 | <input type="checkbox"/><br>4 | <input type="checkbox"/><br>3 | <input type="checkbox"/><br>2 | <input type="checkbox"/><br>1 |
| Global02  | In general, would you say your quality of life is: .....                                                                                                                                                                               | <input type="checkbox"/><br>5 | <input type="checkbox"/><br>4 | <input type="checkbox"/><br>3 | <input type="checkbox"/><br>2 | <input type="checkbox"/><br>1 |
| Global03  | In general, how would you rate your physical health? .....                                                                                                                                                                             | <input type="checkbox"/><br>5 | <input type="checkbox"/><br>4 | <input type="checkbox"/><br>3 | <input type="checkbox"/><br>2 | <input type="checkbox"/><br>1 |
| Global04  | In general, how would you rate your mental health, including your mood and your ability to think? .....                                                                                                                                | <input type="checkbox"/><br>5 | <input type="checkbox"/><br>4 | <input type="checkbox"/><br>3 | <input type="checkbox"/><br>2 | <input type="checkbox"/><br>1 |
| Global05  | In general, how would you rate your satisfaction with your social activities and relationships? .....                                                                                                                                  | <input type="checkbox"/><br>5 | <input type="checkbox"/><br>4 | <input type="checkbox"/><br>3 | <input type="checkbox"/><br>2 | <input type="checkbox"/><br>1 |
| Global09r | In general, please rate how well you carry out your usual social activities and roles. (This includes activities at home, at work and in your community, and responsibilities as a parent, child, spouse, employee, friend, etc.)..... | <input type="checkbox"/><br>5 | <input type="checkbox"/><br>4 | <input type="checkbox"/><br>3 | <input type="checkbox"/><br>2 | <input type="checkbox"/><br>1 |
| Global06  | To what extent are you able to carry out your everyday physical activities such as walking, climbing stairs, carrying groceries, or moving a chair? .....                                                                              | <input type="checkbox"/><br>5 | <input type="checkbox"/><br>4 | <input type="checkbox"/><br>3 | <input type="checkbox"/><br>2 | <input type="checkbox"/><br>1 |

In the past 7 days...

|           |                                                                                                               |                                          |                               |                               |                               |                               |                               |                               |                               |                               |                               |                                                         |
|-----------|---------------------------------------------------------------------------------------------------------------|------------------------------------------|-------------------------------|-------------------------------|-------------------------------|-------------------------------|-------------------------------|-------------------------------|-------------------------------|-------------------------------|-------------------------------|---------------------------------------------------------|
|           |                                                                                                               | Never                                    | Rarely                        | Sometimes                     | Often                         | Always                        |                               |                               |                               |                               |                               |                                                         |
| Global10r | How often have you been bothered by emotional problems such as feeling anxious, depressed or irritable? ..... | <input type="checkbox"/><br>5            | <input type="checkbox"/><br>4 | <input type="checkbox"/><br>3 | <input type="checkbox"/><br>2 | <input type="checkbox"/><br>1 |                               |                               |                               |                               |                               |                                                         |
|           |                                                                                                               | None                                     | Mild                          | Moderate                      | Severe                        | Very severe                   |                               |                               |                               |                               |                               |                                                         |
| Global08r | How would you rate your fatigue on average? .....                                                             | <input type="checkbox"/><br>5            | <input type="checkbox"/><br>4 | <input type="checkbox"/><br>3 | <input type="checkbox"/><br>2 | <input type="checkbox"/><br>1 |                               |                               |                               |                               |                               |                                                         |
| Global07r | How would you rate your pain on average? .....                                                                | <input type="checkbox"/><br>0<br>No pain | <input type="checkbox"/><br>1 | <input type="checkbox"/><br>2 | <input type="checkbox"/><br>3 | <input type="checkbox"/><br>4 | <input type="checkbox"/><br>5 | <input type="checkbox"/><br>6 | <input type="checkbox"/><br>7 | <input type="checkbox"/><br>8 | <input type="checkbox"/><br>9 | <input type="checkbox"/><br>10<br>Worst pain imaginable |
